# Supplementary material
Source: PubMed Central journal article supplement (PMC1744063)
Supplement: qualsafety_14_4_310__2.pdf [file qualsafety_14_4_310__2.pdf]

# BENEDICITE, OMNIA OPERA

OR  
The Song of the Three Holy Children

The words from the Apocrypha

The music by  
W. EDWARDS DEMING, Ph. D.

*Allegretto* *f* UNISON, FULL

O all ye Works of the Lord, bless ye the Lord: O ye Angels of the Lord,

HARMONY

bless ye the Lord: praise Him and mag-ni-fy Him for ev-er.

*mf* MEN'S VOICES

O ye Heavens, O ye Waters that be above the firmament, O all ye Powers of the Lord,

*May be sung in unison if desired*

Published by W. EDWARDS DEMING  
4924 Butterworth Place, Washington 20016

*f*

bleſs ye the Lord: praife Him, and mag-ni-fy Him for ev-er.

*p* WOMEN'S VOICES

O ye Sun and Moon, O ye Stars of heav'n, O ye Showers and Dew,

bleſs ye the Lord: praife Him and mag-ni-fy Him for ev-er.

*f* UNISON, FULL

O ye Winds of God, O ye Fire and Heat, O ye Winter and Summer, bleſs ye the

*p subito e meno mosso*

Lord: praife Him and mag-ni-fy Him for ev-er.

*p subito e meno mosso*

MEN'S VOICES  
*f a tempo*

O ye Dews and Frosts, O ye Frost and Cold, O ye Ice and Snow,—

*f* HARMONY

praise Him, and mag-ni-fy Him— for ev-er.  
bless ye the Lord:

*mf* UNISON

O ye Nights and Days, O ye Light and Dark-ness, O ye Lightnings and Clouds,

HARMONY

bless ye the Lord: praise Him, and mag-ni-fy Him for ev-er.

*Strict time*

O let the Earth bless the Lord: yea, let it

praise Him, and mag - ni - fy Him for ev - er

*p* WOMEN'S VOICES

O ye Mountains and Hills, { O all ye Green Things } O ye Wells, O ye Seas and Floods,  
upon the earth,

bless ye the Lord: praise Him, and mag - ni - fy Him for ev - er.

MEN'S VOICES

O ye Whales, and all that move in the wa-ters, O all ye Fowls of the air, O all ye Beasts and

*f* HARMONY  
praise Him, and

Cattle, O ye Child-ren of Men, bless ye the Lord: *f*

*mf*  
mag-ni-fy Him— for ev-er. O, let Is-ra-el bless the Lord:

*mf*

praise Him and mag-ni-fy Him for ev-er. *p* *mp*  
{ O ye Priests } { O ye Servants }  
of the Lord, } of the Lord, }

*mf* *crescendo*  
O ye Spirits and Souls of the Righteous, { O ye holy }  
{ and humble } Men of heart, bless ye the

*rit.*  
Lord: praise Him, and mag-ni-fy Him— for ev-er.

(According to the American prayer book)

*mp a tempo* *decrescendo*

Let us bless the Fa - ther, and the Son, and the Ho - - ly

*f* *dim. e poco rit. p*

Ghost: praise Him, and mag - ni - fy Him for ev - #er.

(According to the English prayer book)

*f* MEN'S VOICES *a tempo*

O Ananias, Az - a - ri - us and Mis - a - el, bless ye the Lord:

HARMONY

*f* praise Him and mag - ni - fy Him for ev - er.

*p* Glo - ry be to the Fa - ther, and to the Son: And to the

*decrescendo* *mf* was in the be -

Ho - ly Ghost; As it was in the be - gin - ning is now and

was in the be -

*maestoso* *molto rit.* A - men.

ev - er shall be: World with - out end. *p* A - - - - - men.

A - men.
