# Supplementary material
Source: PubMed Central journal article supplement (PMC1744063)
Supplement: qualsafety_14_4_310__3.pdf [file qualsafety_14_4_310__3.pdf]

Inscribed to  
The Reverend H. H. D. Sterrett,  
All Souls Memorial Church, Washington, D. C.

I BOW MY KNEES UNTO THE FATHER

Ephesians 111, 14-21.

W. Edwards Deming

Andante sostenuto

The musical score is written for voice and piano. It consists of five systems of music. The first system is an instrumental introduction in G major, 2/2 time, marked 'mp'. The second system begins with the vocal entry: 'I bow my knees un-to the Fa - - - ther, I bow my'. The piano accompaniment features a steady bass line and chords. The third system continues the vocal line: 'knees un-to the Fa - - - ther, The Fa - ther of our Lord Je - sus Christ, Of'. The piano accompaniment includes a triplet of eighth notes in the right hand. The fourth system continues: 'knees un-to the Fa - - - ther, The Fa - ther of our Lord Je - sus Christ, Of'. The tempo is marked 'piu mosso' and dynamics range from 'f' to 'p'. The fifth system concludes the piece with the same tempo and dynamics. The piano accompaniment features a triplet of eighth notes in the right hand and a triplet of eighth notes in the left hand.

mp

I bow my knees un-to the Fa - - - ther, I bow my

mp

knees un-to the Fa - - - ther, The Fa - ther of our Lord Je - sus Christ, Of

piu mosso

piu mosso

andante *p* dolce

whom the whole fam-i-ly in heav'n and earth is named, Of whom the whole

andante *p* dolce

fam-i-ly in heav'n and earth is named; That Christ may dwell in your

*poco rit.* *mp* a tempo

cre . . . . seen . . . . do hearts by faith; That ye be-ing root-ed and ground-ed in love, may com-pre-

*poco rit.* a tempo

cre . . . . seen . . . . do hearts by faith; That ye be-ing root-ed and ground-ed in love, may com-pre-

cre . . . . seen . . . . do *f*

cre . . . . seen . . . . do hearts by faith; That ye be-ing root-ed and ground-ed in love, may com-pre-

cre . . . . seen . . . . do *f*

cre . . . . seen . . . . do hearts by faith; That ye be-ing root-ed and ground-ed in love, may com-pre-

stringendo *ff*

hend with all saints, what is the breadth and length and depth and height, And

stringendo *ff* *p*

stringendo *ff* *p*

*a tempo* *mp*

know the love of Christ, which pass-eth know-ledge; That ye may be filled with all the

*a tempo* *mp*

*a tempo* *mp*

lar . . . gan . . . do

ful-ness of God, un-to whom be glo-ry thru-out all ag-es, world with-out end. A-men.

lar . . . gan . . . do
