# Supplementary material
Source: PubMed Central journal article supplement (PMC1744063)
Supplement: qualsafety_14_4_310__6.pdf [file qualsafety_14_4_310__6.pdf]

# MISSA SPIRITUI SANCTO

(Mass to the Holy Ghost)

Voices in unison

For choir or for congregational singing

by

W. Edwards Deming

# KYRIE ELEISON

W. Edwards Deming

*Allegro*

Musical score for Pedal oboe, featuring a treble clef and a series of rhythmic patterns.

*Pedal oboe*

Voices in unison

*f a tempo*

Musical score for voices and piano. The piano part includes a treble and bass clef with various dynamics and articulations.

*largo. ....*

Ky - ri -

*f a tempo*

*Add pedal reeds*

Musical score for voices and piano. The piano part includes a treble and bass clef with various dynamics and articulations.

e e - - le - - - son. Ky - ri - e e - - le - - - son Ky - ri -

*Minus pedal reeds*

W. EDWARDS DEMING  
4924 Butterworth Place  
Washington 20016  
(202) 363-8552

17 March 1989

*ff*  
e e - le - - - son. Chris - te e - le - i - son.

Chris - - te e - le - i - son. Chris - - te e - le - - -

son. Ky-ri - - e e - le - - - son. Ky-ri - e e - le - - son. Ky-ri

*largando*  
e - - - - e - le - - - i - - - son.  
*larganda*

Add pedal reeds

# GLORIA IN EXCELSIS DEO

Priest or Cantor

Tutti

Gloria in excelsis Deo. Et in terra pax ho-

mi-ni-bus bo-nae vol-un-ta-tis. Lau-da-mus te. Be-ne

di-ci-mus te. A-do-ra-mus te, Glo-ri-fi-ca-mus te.

Gra - ti - as ag - i - mus ti - - bi prop - ter mag - num glo - ri - am

*Ped.*

*ff f* tu - am. Do - mi - ne De - us, Rex coe - les - tis. De - us

*ff* Pa - ter om - ni - po - tens. Do - mi - ne Fi - li u - ni - ge - ni - te

Je - su Chris - te. Do - mi - ne De - us,

Ag - nus De - i Fi - li - us Pa - tris. Qui tol - lis pec - ca - ta mun - di,

mi - se - re - re no - bis. Qui tol - lis pec - ca - ta mun - di,

*f*  
su - ci - pe de - pre - ca - ti - o - nem nos - tram. Qui

*f*  
se - des ad dex - ter - am Pa - tris mi - - se - re - re no - - - bis.

Quo - ni - am tu so - lus sanc - tus. Tu so - lus Do - mi - nus. Tu

*ff*

so - - lus Al - - ti - si - mus, Je - - - su Chris - - te. Cum

*f*

Sanc - to - Spi - ri - tu, in Glo - ri - a De - i Pa - - - tris.

*Largando*

*ff*

A - - - - - men.

# SANCTUS

*mf*

Sanc - tus, Sanc - tus, Sanc - - - tus

*mf*

Do - - mi - nus De - - us Sa - - - - ba - oth.

*f* 3 3

Ple - ni sunt cae - li et ter - - ra glo - - ri - a tu - - a. Ho -

3 3



*f* mi - se - re - re no - bis. *mf* A - gnus De - i, Qui

tol - lis pec - ca - ta mun - di, *f* mis - se - re - re no - bis.

*mf* A - gnus De - i, Qui tol - lis pec - ca - - ta mun - di,

*f* Do - na no - bis pa - cem. *p* rit. Do - na no - bis pa - cem.
